# Supplementary material
Source: Springer Nature journal article supplement (https://www.springermedizin.de/resource/supplementary/13063_2014_2181_MOESM2_ESM.pdf/9621572)
Supplement: MOESM2 [file 9621572]

## Readiness to decide

Thinking about your decision to participate in the [insert trial name] trial, please answer the following questions in relation to participating in the trial or not participating in the trial:

1. I know the option, of participating in the trial or not, is available to me.

Yes  Unsure  No

2. I understand the option, of participating in the trial or not, is available to me.

Yes  Unsure  No

3. I am aware of the advantages of participating in the trial or not.

Yes  Unsure  No

4. I am aware of the disadvantages of participating in the trial or not.

Yes  Unsure  No

5. I know how I feel about participating in the trial or not.

Yes  Unsure  No

6. I can imagine what participating in the trial, or not, would be like.

Yes  Unsure  No

7. I can judge whether participating in the trial or not is best for me.

Yes  Unsure  No

8. I can judge whether participating in the trial or not is worst for me.

Yes  Unsure  No

9. I have given the options, of participating in the trial or not, enough thought.

Yes  Unsure  No

10. I am ready to make a choice about participating in the trial or not.

Yes  Unsure  No
